# Supplementary material for: Hand Hygiene and Mask-Wearing Practices during COVID-19 among Healthcare Workers: Misinformation as a Predictor
Source: PubMed Central journal article supplement (PMC8641349; doi:10.4269/ajtmh.21-0463), 2021-10-22
Supplement: tpmd210463.SD1.pdf [file tpmd210463.SD1.pdf]

## Supplemental Appendix

Table A1. Ordinary Least Squares (OLS) models examining the associations between COVID misinformation beliefs and frequencies of health preventive behaviors.

| <b>Panel A: Frequency of washing hands</b>                | Model 1                     | Model 2                     | Model 3                      | Model 4                      |
|-----------------------------------------------------------|-----------------------------|-----------------------------|------------------------------|------------------------------|
| Misinformation beliefs (Ref. = Completely agree or agree) | COVID engineered            | COVID likes a common cold   | The 5G network spreads COVID | Eating garlic prevents COVID |
| Neither agree or disagree                                 | -0.45**<br>(-0.74 - -0.16)  | -0.26<br>(-0.57 - 0.06)     | -0.22<br>(-0.55 - 0.11)      | -0.08<br>(-0.34 - 0.18)      |
| Disagree or completely disagree                           | -0.45**<br>(-0.74 - -0.16)  | -0.48***<br>(-0.76 - -0.20) | -0.82***<br>(-1.15 - -0.50)  | -0.49**<br>(-0.81 - -0.17)   |
| Constant                                                  | 6.13***<br>(5.42 - 6.83)    | 6.06***<br>(5.36 - 6.77)    | 6.20***<br>(5.51 - 6.90)     | 5.89***<br>(5.19 - 6.59)     |
| Observations                                              | 518                         | 518                         | 518                          | 518                          |
| R-squared                                                 | 0.09                        | 0.09                        | 0.11                         | 0.08                         |
| <b>Panel B: Frequency of wearing a mask</b>               | Model 1                     | Model 2                     | Model 3                      | Model 4                      |
| Misinformation beliefs (Ref. = Completely agree or agree) | COVID engineered            | COVID likes a common cold   | The 5G network spreads COVID | Eating garlic prevents COVID |
| Neither agree or disagree                                 | -0.28**<br>(-0.46 - -0.11)  | -0.27**<br>(-0.46 - -0.08)  | -0.03<br>(-0.22 - 0.17)      | -0.06<br>(-0.22 - 0.09)      |
| Disagree or completely disagree                           | -0.32***<br>(-0.49 - -0.14) | -0.31***<br>(-0.48 - -0.15) | -0.60***<br>(-0.79 - -0.40)  | -0.47***<br>(-0.66 - -0.27)  |
| Constant                                                  | 7.10***<br>(6.68 - 7.52)    | 7.08***<br>(6.66 - 7.50)    | 7.15***<br>(6.74 - 7.56)     | 6.96***<br>(6.54 - 7.37)     |
| Observations                                              | 518                         | 518                         | 518                          | 518                          |
| R-squared                                                 | 0.12                        | 0.12                        | 0.15                         | 0.13                         |

Note. All models control for age, ethnicity, educational levels, professions, whether have chronic diseases and whether have had flu-like symptoms in the last six months. Confidence intervals are in parentheses. \*\*\* p<0.001, \*\* p<0.01, \* p<0.05 (two-tailed tests).
